# Supplementary material for: Fabrication of Tween-20 coated PVDF membranes for wastewater treatment: optimization of preparation parameters, removal and membrane fouling control performance
Source: Royal Society of Chemistry journal article supplement (doi:10.1039/c9ra03549d), 2019-01-01

**Supplementary Material:**

**Fabrication of Tween-20 coated PVDF membrane for wastewater  
treatment: Optimization of preparation parameters, removal and  
membrane fouling control performance**

*Daoji Wu<sup>1</sup>, Weiwei Zhou<sup>1,2</sup>, Xiaoxiang Cheng<sup>1,\*</sup>, Congwei Luo<sup>1,\*\*</sup>, Peijie  
Li<sup>1</sup>, Fengzhi Zhang<sup>1</sup>, Zixiao Ren<sup>1</sup>*

*(1. School of Municipal and Environmental Engineering, Shandong Jianzhu  
University, Jinan, Shandong, China, 250101*

*2. Shandong Urban Construction Vocational College, Jinan, Shandong, China, 250103)*

\*Corresponding author.

E-mail address: cxx19890823@163.com (Xiaoxiang Cheng);

luocongwei@sdjzu.edu.cn (Congwei Luo).

**Table S1** Characteristics of commercial PVDF microfiltration membrane.

| Components                           | Parameters            |
|--------------------------------------|-----------------------|
| Type of membrane module              | Hollow fiber membrane |
| Membrane pore size ( $\mu\text{m}$ ) | 0.2                   |
| Fiber inner diameter (mm)            | 0.5                   |
| Fiber outer diameter (mm)            | 0.8                   |
| Original contact angle               | $105^\circ$           |

**Table S2** The main quality of raw wastewater.

| Item           | COD | BOD <sub>5</sub> | SS  | NH <sub>4</sub> -N | pH  |
|----------------|-----|------------------|-----|--------------------|-----|
| Quality (mg/L) | 350 | 150              | 100 | 30                 | 6-9 |

**Fig. S1** Chemical structural formula of Tween-20 ( $x+y+z=20$ ).

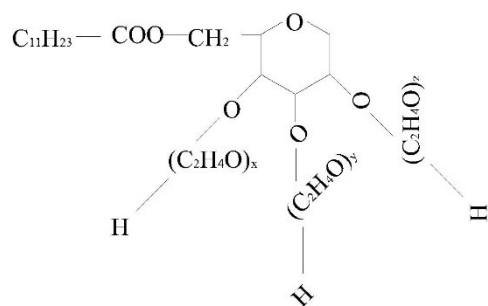

**Fig. S2** Experiment Device of MBR.

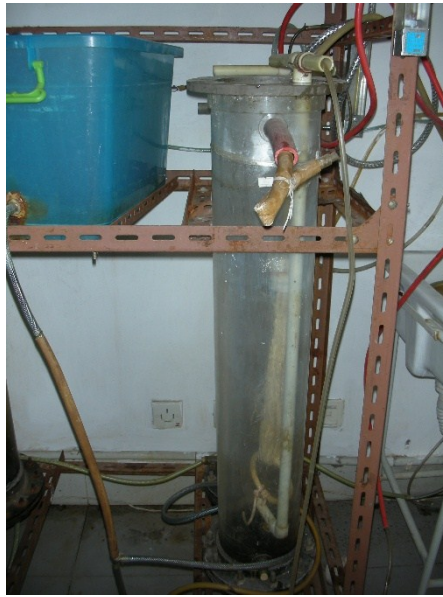

**Fig. S3** FTIR spectra of virgin and Tween-20 modified PVDF membranes.

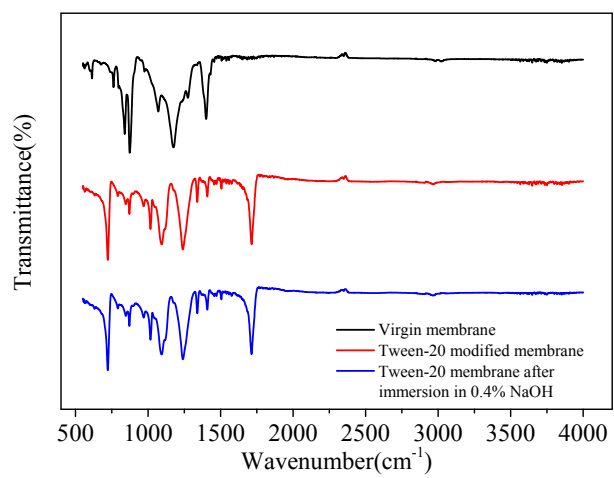

Supplement: c9ra03549d1.pdf [file c9ra03549d1.pdf]
